# Supplementary material
Source: publisher figshare collection journal article supplement (https://acs.figshare.com/ndownloader/files/5141083)
Supplement: Supplementary file 1 [file 5141083]

## Supporting Information for World Wide Web Edition

We failed to separate the isomeric oligodeoxynucleotides 5'-GAGCCAACCTG[(-)G<sup>\*</sup>]CTCTGA and 5'-GAGCCAACCTG[(+)G<sup>\*</sup>]CTCTGA (upper strands of duplexes (+)G<sub>2</sub><sup>\*</sup> and (-)G<sub>2</sub><sup>\*</sup>) by reversed-phase HPLC techniques to a high purity. Instead, we took advantage of the markedly slower electrophoretic mobilities of the oligodeoxynucleotide duplexes bearing (+)-*trans-anti*-B[a]P-*N*<sup>2</sup>-dG adducts as compared to those of the (-)-*trans-anti*-B[a]P-*N*<sup>2</sup>-dG adducts (1-3), to separate the (+)G<sub>2</sub><sup>\*</sup> and the (-)G<sub>2</sub><sup>\*</sup> duplexes from one another. Thereafter the unmodified strands 5'-TCAGAGCCAGGTTGGCTC were separated from the modified oligodeoxynucleotides 5'-GAGCCAACCTG[(-)G<sup>\*</sup>]CTCTGA or 5'-GAGCCAACCTG[(+)G<sup>\*</sup>]CTCTGA by 20% denaturing PAGE. These strands, as well as the 5'-GAGCCAACCT[(-)G<sup>\*</sup>]GCTCTGA and 5'-GAGCCAACCT[(+)G<sup>\*</sup>]GCTCTGA strands, were separately loaded onto denaturing 20% polyacrylamide gel to determine their mobilities. Each sample exhibited a single band indicating that the samples were of acceptable purity (Figure 1S). The modified oligodeoxynucleotides (each of the upper strands in oligodeoxynucleotide duplexes (+)G<sub>1</sub><sup>\*</sup>, (-)G<sub>1</sub><sup>\*</sup>, (+)G<sub>2</sub><sup>\*</sup>, and (-)G<sub>2</sub><sup>\*</sup>) moved more slowly than the corresponding unmodified oligodeoxynucleotides.

**Table 1S.** Thermodynamic parameters of helix-coil transition of B[a]PDE-modified DNA duplexes

| Designation                    | Oligodeoxynucleotide duplex <sup>a</sup>                                             | T <sub>m</sub> , °C <sup>b</sup> | h, % <sup>c</sup> |
|--------------------------------|--------------------------------------------------------------------------------------|----------------------------------|-------------------|
| U                              | 5'-GAGCCAA <b>CCTGG</b> CTCTGA<br>3'-CTCGGTT <b>GGACC</b> GAGACT                     | 70.3                             | 16                |
| (-)G <sub>1</sub> <sup>*</sup> | 5'-GAGCCAA <b>CCT [(-)G<sup>*</sup>]</b> GCTCTGA<br>3'-CTCGGTT <b>GGA—C—</b> CGAGACT | 65.0                             | 15                |
| (+)G <sub>1</sub> <sup>*</sup> | 5'-GAGCCAA <b>CCT [(+)G<sup>*</sup>]</b> GCTCTGA<br>3'-CTCGGTT <b>GGA—C—</b> CGAGACT | 65.5                             | 15                |
| (-)G <sub>2</sub> <sup>*</sup> | 5'-GAGCCAA <b>CCTG [(-)G<sup>*</sup>]</b> CTCTGA<br>3'-CTCGGTT <b>GGAC—C—</b> GAGACT | 67.8                             | 13                |
| (+)G <sub>2</sub> <sup>*</sup> | 5'-GAGCCAA <b>CCTG [(+)G<sup>*</sup>]</b> CTCTGA<br>3'-CTCGGTT <b>GGAC—C—</b> GAGACT | 67.1                             | 14                |

<sup>a</sup> – (-)G<sup>\*</sup> is (-)-*trans-anti*-B[a]P-*N*<sup>2</sup>-dG and (+)G<sup>\*</sup> is (+)-*trans-anti*-B[a]P-*N*<sup>2</sup>-dG.

<sup>b</sup> – accuracy of T<sub>m</sub> determination is  $\pm 0.5$  degrees; C<sub>ds</sub> 2  $\mu$ M, buffer D,  $\lambda$  260 nm.

<sup>c</sup> – hyperchromicity values was calculated according to equation:  $h = \frac{A_{260}^{85^0} - A_{260}^{25^0}}{A_{260}^{85^0}} \cdot 100$ ,

where  $A_{260}^{85^0}$  and  $A_{260}^{25^0}$  are absorbances at 260 nm of oligodeoxynucleotides mixture at 85<sup>0</sup> and at 25<sup>0</sup>C respectively.

The hyperchromicities for B[a]PDE-modified oligodeoxynucleotide duplexes (+)G<sub>1</sub><sup>\*</sup>, (-)G<sub>1</sub><sup>\*</sup>, (+)G<sub>2</sub><sup>\*</sup>, and (-)G<sub>2</sub><sup>\*</sup> ranged from 13-15%, which were not too different from the hyperchromicity observed in the case of the unmodified duplex U.

## FIGURE LEGENDS

**Figure 1S.** Denaturing 20% PAGE of purified single-stranded  $^{32}\text{P}$ -labeled 18-mer oligodeoxynucleotides: 5'-TCAGAGCCAGGTTGGCTC, 5'-GAGCCAACCTGGCTCTGA, 5'-GAGCCAACCT[(-)G<sup>\*</sup>]GCTCTGA, 5'-GAGCCAACCT[(+)G<sup>\*</sup>]GCTCTGA, 5'-GAGCCAACCTG[(-)G<sup>\*</sup>]CTCTGA, 5'-GAGCCAACCTG[(+)G<sup>\*</sup>]CTCTGA.

**Figure 2S.** Direct titration of fluorescein-labeled FAM-U duplex with M.EcoRII, studied by means of the fluorescence polarization method. The solid line represents a best fit to a simple binding isotherm. The concentration of the FAM-U is 50 nM. It is significantly higher than the value of  $K_d$  expected for the M.EcoRII/AdoHcy/FAM-U complex (the  $K_d$  for a M.EcoRII/AdoHcy/(unmodified 14-mer oligodeoxynucleotide duplex) was about 5 nM (4)). Thus, each protein molecule added to the reaction mixture is expected to bind to the oligodeoxynucleotide duplex. The value of  $P$  increases with increasing protein concentration leveling off at a value of  $P \approx 0.30$ , characterizing the  $P$  value of the ternary complex M.EcoRII/AdoHcy/FAM-U. The point where the two asymptotic lines intersect corresponds to M.EcoRII concentration 475 nM. As the concentration of the M.EcoRII active form at this point is equal to the concentration of the FAM-U duplex (50 nM), the fraction of the enzyme bound is 11%.

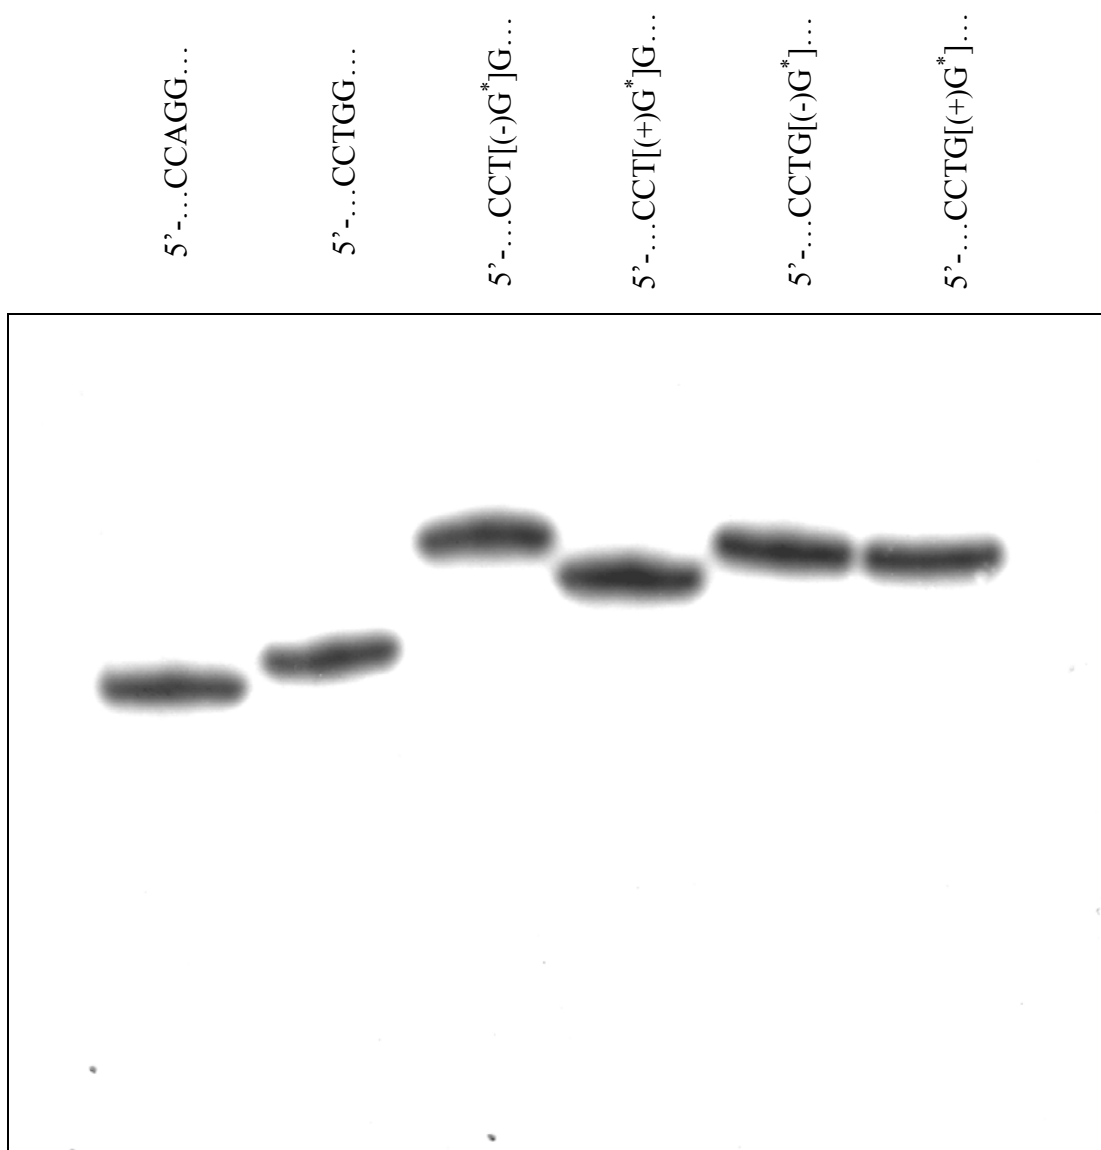

**Fig. 1S**

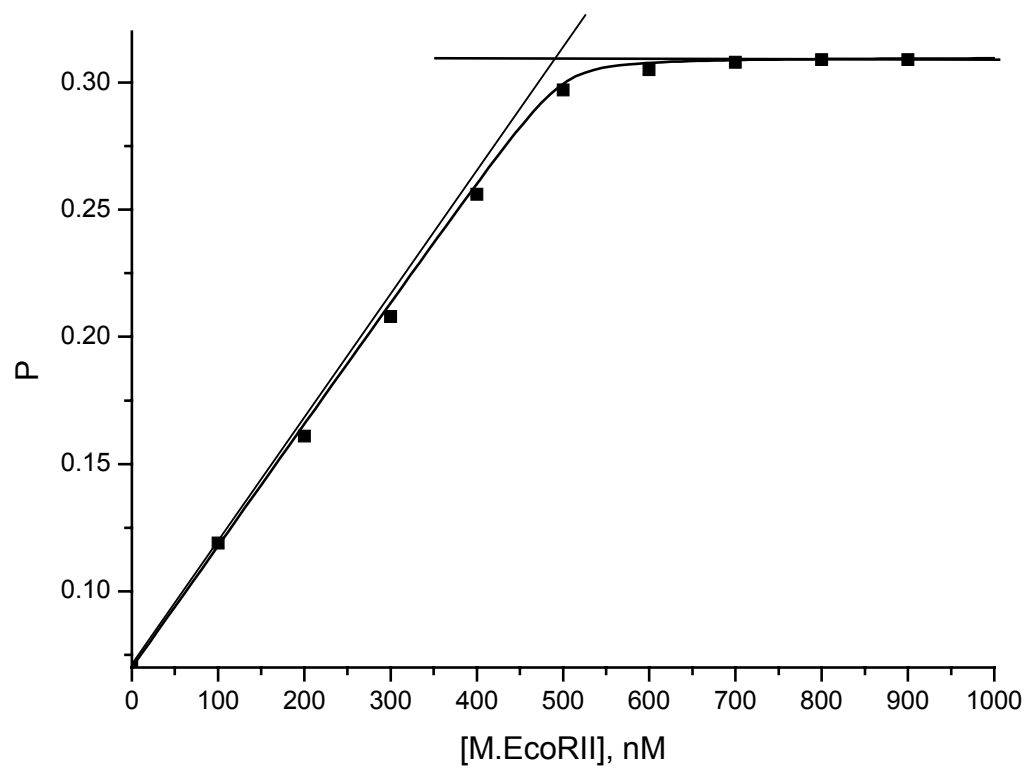

**Fig. 2S**

1. Huang, X., Kolbanovskiy, A., Wu, X., Zhang, Y., Wang, Z., Zhuang, P., Amin, S., and Geacintov, N. E. (2003) Effects of base sequence context on translesion synthesis past a bulky (+)-*trans-anti*-B[a]P- $N^2$ -dG lesion catalyzed by the Y-family polymerase pol  $\kappa$ , *Biochemistry* 42, 2456-2466.
2. Liu, T., Xu, J., Tsao, H., Li, B., Xu, R., Yang, C., Amin, S., Moriya, M., and Geacintov, N. E. (1996) Base sequence-dependent bends in site-specific benzo[a]pyrene diol epoxide-modified oligodeoxynucleotide duplexes, *Chem. Res. Toxicol.* 9, 255-261.
3. Huang, X., Colgate, K. C., Kolbanovskiy, A., Amin, S., and Geacintov, N. E. (2002) Conformational changes of a benzo[a]pyrene diol epoxide- $N^2$ -dG adduct induced by a 5'-flanking 5-methyl-substituted cytosine in a (Me)CG double-stranded oligodeoxynucleotide sequence context, *Chem. Res. Toxicol.*, 15, 438-444.
4. Subach, O. M., Khoroshaev, A. V., Gerasimov, D. N., Baskunov, V. B., Shchyolkina, A. K., and Gromova, E. S. (2004) 2-Pyrimidinone as a probe for studying the EcoRII DNA methyltransferase-substrate interaction, *Eur. J. Biochem.* 271, 2391-2399.
